# Supplementary material
Source: publisher figshare collection journal article supplement (https://karger.figshare.com/ndownloader/files/31070422)
Supplement: Supplementary file 1 [file 31070422]

Supplementary Table 4. The characteristics of the subjects by the status of SUA.

| Characteristics | Normal SUA (*N*=19814) | Hyperuricemia (*N*=3448) | Overall | *p value* |
| --- | --- | --- | --- | --- |
| Male, n (%) | 11504(58.1) | 2843(82.5) | 14347(61.7) | <0.001 |
| Age (years), *M* (P25,P75) | 43(38,50) | 43(36,50) | 43(38,50) | 0.002 |
| Education level, n (%) |  |  |  | <0.001 |
| Junior high school or below | 7358(37.1) | 1121(32.5) | 8479(36.5) |  |
| High or secondary school | 5738(29.0) | 1021(29.6) | 6759(29.1) |  |
| Junior college or above | 6718(33.9) | 1306(37.9) | 8024(34.5) |  |
| Household income (RMB), n (%) |  |  |  | 0.044 |
| < 2000 | 10459(52.8) | 1756(50.9) | 12215(52.5) |  |
| ≧ 2000 | 9355(47.2) | 1692(49.1) | 11047(47.5) |  |
| Occupational, n (%) |  |  |  | 0.004 |
| Cadre | 2059(10.4) | 420(12.2) | 2479(10.7) |  |
| Technical staff | 904(4.6) | 171(5.0) | 1075(4.6) |  |
| Worker | 15961(80.6) | 2723(79.0) | 18684(80.3) |  |
| Logistical service personnel | 890(4.5) | 134(3.9) | 1024(4.4) |  |
| Smoking status, n (%) |  |  |  | <0.001 |
| Never smoker | 11300(57.0) | 1379(40.0) | 12679(54.5) |  |
| Current smoker | 7183(36.3) | 1722(49.9) | 8905(38.3) |  |
| Former smoker | 1331(6.7) | 347(10.1) | 1678(7.2) |  |
| Drinking status, n (%) |  |  |  | <0.001 |
| Never drinker | 15141(76.4) | 2128(61.7) | 17269(74.2) |  |
| Current drinker | 3960(20.0) | 1150(33.4) | 5110(22.0) |  |
| Former drinker | 713(3.6) | 170(4.9) | 883(3.8) |  |
| Exercising status, n (%) |  |  |  | 0.001 |
| Never exerciser | 2806(14.2) | 499(14.5) | 3305(14.2) |  |
| Occasionally exerciser | 8145(41.1) | 1520(44.1) | 9665(41.5) |  |
| Frequently exerciser | 8863(44.7) | 1429(41.4) | 10292(44.2) |  |
| Family history of stroke, n (%) | 920(4.6) | 165(4.8) | 1085(4.7) | 0.715 |
| BMI (kg/m2), *M* (P25,P75) | 23.00(20.95,25.21) | 25.24(23.19,27.24) | 23.33(21.19,25.61) | <0.001 |
| SBP (mmHg), *M* (P25,P75) | 120(108,132) | 128(116,139) | 121(109,133) | <0.001 |
| DBP (mmHg), *M* (P25,P75) | 76(69,85) | 81(73,90) | 77(70,85) | <0.001 |
| TC (mmol/L), *M* (P25,P75) | 4.60(4.00,5.20) | 4.80(4.20,5.48) | 4.60(4.10,5.20) | <0.001 |
| TG (mmol/L), *M* (P25,P75) | 1.50(1.00,2.10) | 2.10(1.50,3.10) | 1.50(1.10,2.30) | <0.001 |
| HDL-C (mmol/L), *M* (P25,P75) | 1.35(1.14,1.59) | 1.22(1.04,1.44) | 1.33(1.12,1.57) | <0.001 |
| LDL-C (mmol/L), *M* (P25,P75) | 2.99(2.54,3.48) | 3.11(2.64,3.59) | 3.00(2.55,3.49) | <0.001 |
| FPG (mmol/L), *M* (P25,P75) | 5.00(4.70,5.40) | 5.20(4.80,5.70) | 5.00(4.70,5.50) | <0.001 |
| eGFR (mL/min/1.73m2), *M* (P25,P75) | 106.73(97.19,113.80) | 103.23(91.52,111.60) | 106.23(96.42,113.52) | <0.001 |

SUA, serum uric acid; BMI, body mass index; SBP, systolic blood pressure; DBP, diastolic blood pressure; TC, total cholesterol; TG, triglycerides; HDL-C, high-density lipoprotein cholesterol; LDL-C, low-density lipoprotein cholesterol; FPG, fasting plasma glucose; eGFR, estimated glomerular filtration rate.

Household income, Household monthly income per capita; Hyperuricemia, SUA ≧ 420 μmol/L for males and SUA ≧ 360 μmol/L for females.
